# Supplementary material
Source: Springer Nature journal article supplement (https://www.springermedizin.de/resource/supplementary/13256_2011_2164_MOESM5_ESM.pdf/9649152)

**a**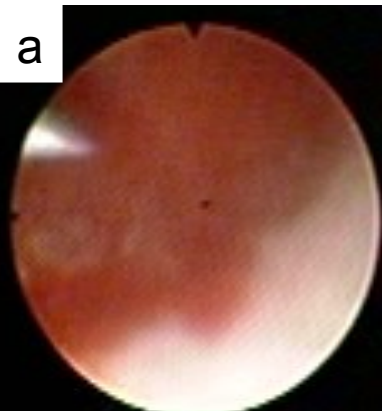**b**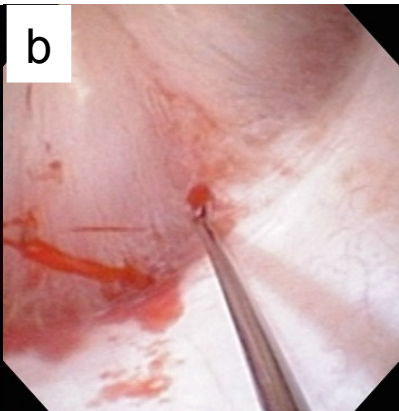**c**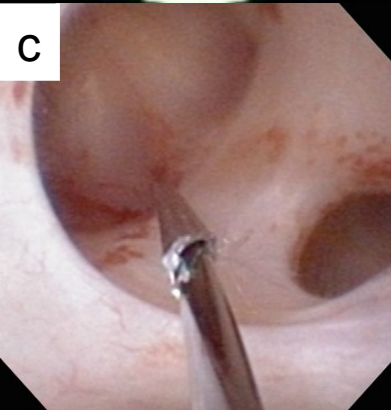**d**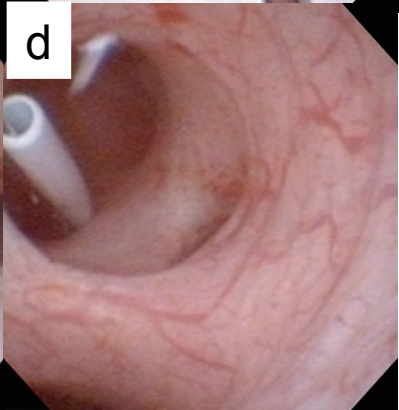**e**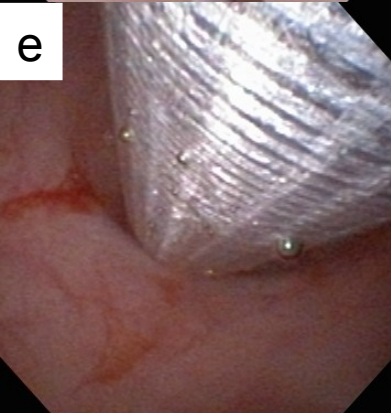**f**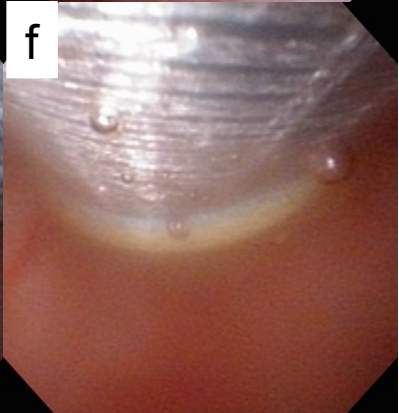

Supplement: MOESM5 [file 9649152]
